# Supplementary material for: The phylogenetic landscape and nosocomial spread of the multidrug-resistant opportunist Stenotrophomonas maltophilia
Source: PubMed Central journal article supplement (PMC7184733; doi:10.1038/s41467-020-15123-0), 2020-04-27
Supplement: 41467_2020_15123_MOESM4_ESM.pdf [file 41467_2020_15123_MOESM4_ESM.pdf]

## **Description of Additional Supplementary Files**

File Name: Supplementary Data 1

Description: List of NCBI GeneBank accession numbers of the 171 assembled genomes used to create the whole-genome Multilocus sequence typing scheme.

File Name: Supplementary Data 2

Description: Characteristics of the 17,603 loci of the whole-genome Multilocus Sequence Typing scheme.

File Name: Supplementary Data 3

Description: Accession numbers and associated metadata for all 1,305 *S. maltophilia* isolates included in the phylogenetic analysis.

File Name: Supplementary Data 4

Description: Sequence metrics, number of consensus whole genome Multilocus sequence typing allele calls of all 1305 *S. maltophilia* isolates and other *Stenotrophomonas* species.

File Name: Supplementary Data 5

Description: Valid allele call numbers assigned by whole genome multilocus sequence typing scheme as implemented in bionumerics for all 1,305 *S. maltophilia* isolates.
